# Supplementary material for: Mechanochemical Knoevenagel condensation investigated in situ
Source: publisher site journal article supplement (doi:10.3762/bjoc.13.197), 2017-09-26
Supplement: Additional file 1 [file 1860-5397-13-197-S1.pdf]

**Supporting Information**

**for**

**Mechanochemical Knoevenagel condensation**

**investigated in situ**

Sebastian Haferkamp<sup>1,2</sup>, Franziska Fischer<sup>1</sup>, Werner Kraus<sup>1</sup> and Franziska Emmerling\*<sup>1</sup>

Address: <sup>1</sup>BAM Federal Institute for Materials Research and Testing, Richard-Willstaetter-Str. 11, 12489 Berlin, Germany and <sup>2</sup>Department of Chemistry, Humboldt-Universität zu Berlin, Brook-Taylor-Str. 2, 12489 Berlin, Germany  
Email: Franziska Emmerling - franziska.emmerling@bam.de

\*Corresponding author

**Raman spectra and XRPD data**

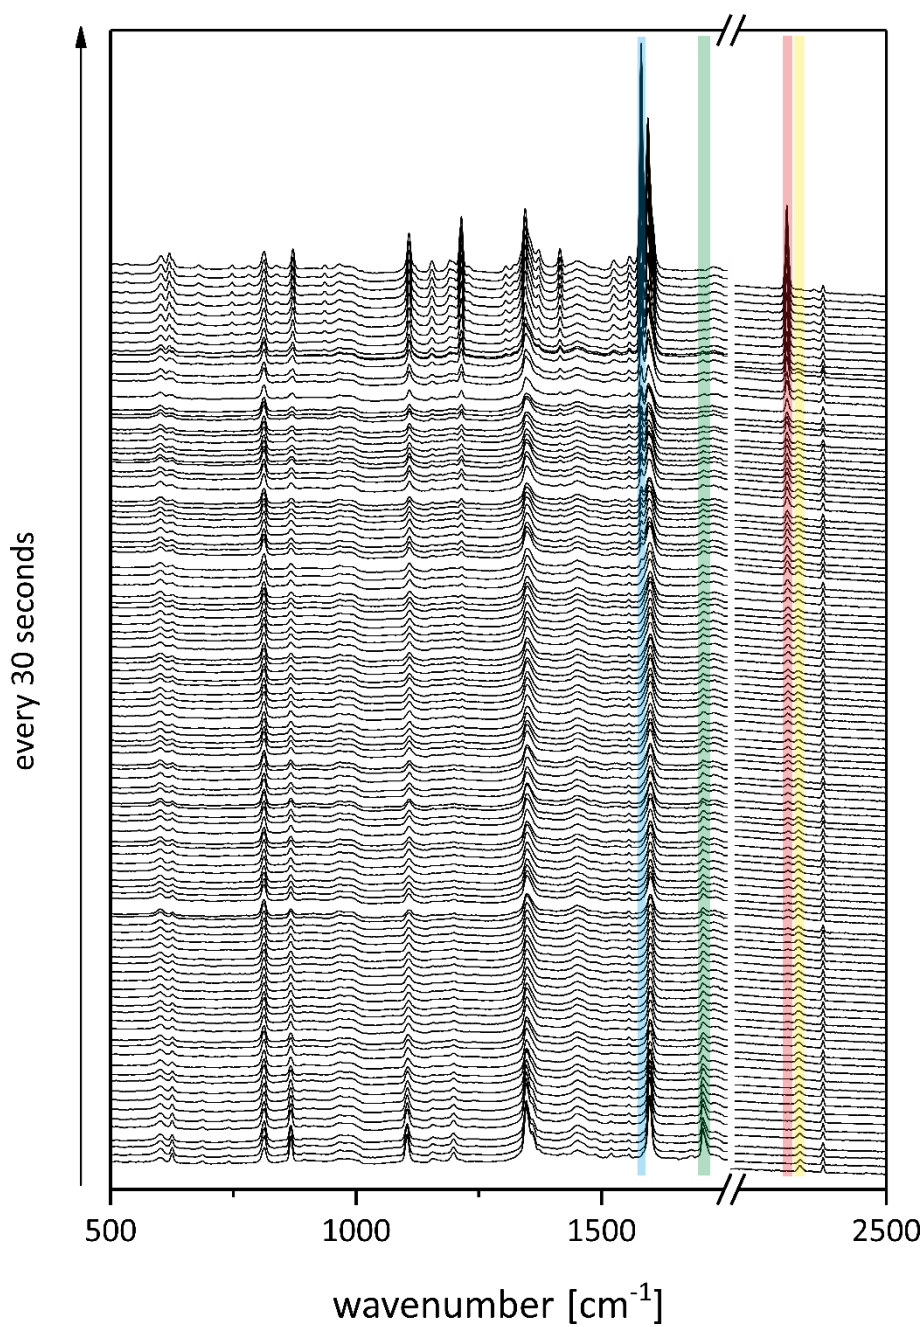

**Figure S1:** Time-resolved Raman spectra measured simultaneously. The progress of the reaction can be detected from the decreasing signal of the C=O-stretching band of **1** at  $1706\text{ cm}^{-1}$  (green) and the increasing signal of the C=C-stretching band at  $1581\text{ cm}^{-1}$  (blue). The band attributed to the C≡N-stretching shifts from  $2266\text{ cm}^{-1}$  (yellow) in **2** to  $2233\text{ cm}^{-1}$  (red) in the product.

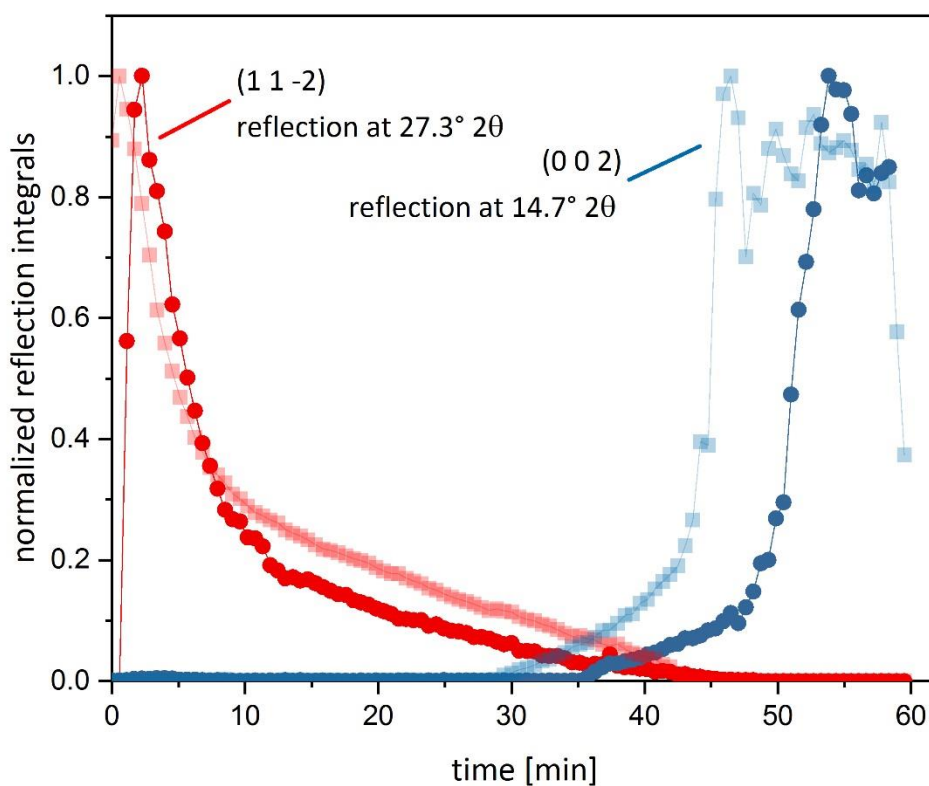

**Figure S2:** Quantitative evaluation of the PXRD reflections intensities of selected reactant (red (11-2) reflection of **1**) and product reflections (blue (002) reflection of **3**). The PXRD data are representative measurements of repeated sets measured at two different beam times (intensive colour November 2016 and light colour August 2017). The data indicate a high reproducibility of the results. The course of the reaction can be divided in three steps. First a fast consumption of the reactant **1** is observed. After 11 minutes a decelerated consumption is observed. The formation of the product **3** starts after approx. 35 minutes and is characterized by a slow (until approx. 48 min.) and finally a very fast conversion.
